# **The risk and risk factors of chikungunya virus infection and rheumatological sequelae in a cohort of U.S. Military Health System beneficiaries: implications for the vaccine era**

Pollett SD<sup>1,2\*</sup>, Hsieh H-C<sup>1,2</sup>, Lu D<sup>1,2</sup>, Grance M<sup>1,2</sup>, Nowak G<sup>3</sup>, Lanteri C<sup>1</sup>, Tribble D<sup>1</sup>, Burgess TH<sup>1</sup>

<sup>1</sup>Infectious Disease Clinical Research Program, Department of Preventive Medicine and Biostatistics, Uniformed Services University of the Health Sciences, Bethesda, Maryland, United States of America

<sup>2</sup>Henry M. Jackson Foundation for the Advancement of Military Medicine, Inc., Bethesda, Maryland, United States of America

<sup>3</sup>EpiData Center, Navy and Marine Corps Public Health Center, Portsmouth, Virginia, United States of America

\* Corresponding author

Email: [spollett@idcrp.org](mailto:spollett@idcrp.org)

## Abstract

**Background:** Understanding the risk of chikungunya virus (CHIKV) infection and rheumatic sequelae across populations, including travelers and the military, is critical. We leveraged the electronic medical records of about 9.5 million U.S. Military Health System (MHS) beneficiaries to identify the risk of post-CHIKV rheumatic sequelae. **Methodology/Principal Findings:** MHS beneficiary CHIKV infections diagnosed 2014–2018 were identified from the Disease Reporting System internet, TRICARE Encounter Data Non-Institutional, and Comprehensive Ambulatory/Professional Encounter Record systems. Non-CHIKV controls were matched (1:4) by age, gender, beneficiary status, and encounter date. The frequency of comorbidities and incident rheumatic diagnoses through 2020 were derived from International Classification of Diseases codes and compared between cases and controls. Logistic regression models estimated the association of CHIKV infection with rheumatic sequelae and risk factors for post-CHIKV sequelae. 195 CHIKV cases were diagnosed between July 2014 and December 2018. The mean age was 42 years, and 43.6% were active duty. 63/195 (32.3%) of CHIKV cases had an incident rheumatic diagnosis, including arthralgia, polyarthritis, polymyalgia rheumatica, and/or rheumatoid arthritis, compared to 156/780 (20.0%) of controls ( $p < 0.001$ ). CHIKV infection remained associated with rheumatic sequelae (aOR = 1.911,  $p = 0.002$ ) after adjusting for prior rheumatic disease and demography. Those with rheumatic CHIKV sequelae had a median 7 healthcare encounters (IQR 3–15). Among CHIKV infections, we found no association between post-CHIKV rheumatic sequelae and demography, service characteristics, or comorbidities. **Conclusions/Significance:** CHIKV infection is uncommon but associated with rheumatic sequelae among MHS beneficiaries, with substantial healthcare requirements in a proportion of cases with such sequelae. No demographic, clinical, or occupational variables were associated with post-CHIKV rheumatic sequelae, suggesting that prediction of these complications is challenging in MHS beneficiaries. These findings are important context for future CHIKV vaccine decision making in this and other populations.

## Author summary:

We examined U.S. Military Health System (MHS) electronic medical records during to identify the likelihood of rheumatic complications after chikungunya virus (CHIKV) infection. Overall, CHIKV infections were rare in the MHS, with 195 cases found in the records between 2014 and 2018 (a period which encompassed the peak of the CHIKV epidemic in the Americas). Of these, about 32% received a rheumatic diagnosis after infection, including arthralgia, polyarthritits, polymyalgia rheumatica, and rheumatoid arthritis. Patients who had a rheumatic diagnosis had on average 7 healthcare encounters for their post-CHIKV rheumatic complication, and a quarter had more than 15 healthcare encounters. We did not find any demographic, clinical, or occupational characteristics associated with developing rheumatic complications after CHIKV, suggesting that predicting rheumatic complications from CHIKV may be challenging in MHS beneficiaries. These findings may provide important context for decisions about implementing an approved chikungunya vaccine to military servicemembers and other MHS beneficiaries.

## Introduction

Chikungunya virus (CHIKV) is a mosquito-borne alphavirus belonging to the *Togaviridae* family [1]. The ecology of CHIKV is characterized by a sylvatic cycle involving non-human primates and arboreal *Aedes* species and urban human-to-human transmission cycles involving the *A. aegypti* and *A. albopictus* vectors [1]. While CHIKV is defined by a single serotype, multiple genotypes have evolved with global geographic expansion including the Asian and descendant Asian-Caribbean lineages, and East/Central/South African and Indian Ocean lineages [1-3].

The 2013–2015 neotropical epidemic in the Americas involved over 1.6 million suspected or confirmed CHIKV cases [4]. While cases rapidly declined after the initial neotropical pandemic, there is an ongoing substantive CHIKV burden in the Americas in addition to ongoing circulation in Africa [5, 6] and Asia [7, 8]. Recently, the Pan American Health Organization issued an alert indicating the geographic range of CHIKV has expanded in the Americas, with notable resurgence in certain regions of Latin America [9-11].

Acute CHIKV infection illness is characterized by a high symptomatic-to-asymptomatic ratio, with clinical features including an abrupt onset of high fever, polyarthralgia, backache, headache, and fatigue [12]. Atypical acute CHIKV illness manifestations (e.g., acute encephalitis) are rare, potentially severe, and more often occur in the extremes of age and in those with underlying comorbidities [12-17]. Diagnosis of CHIKV infection relies on blood polymerase chain reaction (PCR) within the first week of illness and serology thereafter [18]. Management of acute CHIKV is generally supportive, with fluid replacement, analgesia and avoidance of non-steroidal anti-inflammatory drugs until dengue has been excluded as a differential diagnosis [19]. There are no current vaccines or other preventive medical countermeasures available for CHIKV aside from avoidance of vectors in endemic transmission regions [19]. Advanced vaccine development has been challenging due to the unpredictable nature of CHIKV outbreaks [20]. However, CHIKV vaccine U.S. Food and Drug Administration licensure may soon occur using a serological correlate of protection [21].

The rheumatological manifestations of CHIKV may be categorized by timing and clinical phenotype [22]. Acute CHIKV arthralgia is frequently reported and mostly occurs in mostly peripheral joints with a symmetrical pattern, although large joints can be affected [22]. Joint swelling and synovitis often accompanies this acute polyarthralgia; functional impairment during this acute phase is common due to debilitating pain [22]. Chronic rheumatological manifestations typically involve the joints affected in

acute CHIKV arthralgia [22]. Estimates on the frequency of persistent post-acute manifestations (predominantly arthralgia or arthritis) vary significantly, with metanalysis estimates as high as 43% at 3 months, 21% at 12 months, and 14% at 18 months after initial CHIKV illness onset [22-24]. This heterogeneity is believed to reflect differences in study populations and methodologies. Pathogenesis studies have indicated that persistent host inflammation, rather than persistent synovial viral replication, plays a key role in post-CHIKV arthralgia [25, 26]. There is currently a wide variation in clinical management for chronic post-CHIKV sequelae [15] but post-acute CHIKV arthropathy is severe enough in some to warrant the use of biological or disease-modifying antirheumatic drugs [27].

While those residing in CHIKV endemic regions experience the highest burden of this arbovirus, travelers and the deploying military are also significant stakeholders for understanding the risk of CHIKV infection and post-CHIKV sequelae. There is limited published data on the burden of CHIKV in U.S. Military Health System (MHS) beneficiaries [28, 29] and none define the risk and risk factors of post-acute CHIKV sequelae in this population. Understanding the risk and risk factors of CHIKV and CHIKV sequelae is important for clinical prognostication and may support cost-effectiveness analyses for vaccine policy with potential future licensed vaccines; such findings may be generalizable to traveler populations also.

The objectives in this study were to describe to characterize incident CHIKV cases that were diagnosed in the MHS between 2014–2018 and to further describe the risk and risk factors of acute and chronic post-CHIKV rheumatological sequelae in such CHIKV cases, compared to matched controls. Here, we leveraged a virtual cohort derived from over 9.5 million MHS beneficiaries, with follow-up through 2020.

## Methods

## **Population, setting and identification of CHIKV cases and matched controls**

The MHS serves approximately 9.5 million beneficiaries, including active duty servicemembers, retirees and dependents. This includes care delivered within the United States, U.S. Territories (including Puerto Rico, Guam, and the U.S. Virgin Islands), and in beneficiaries located other countries.

For this study, we identified deduplicated unique CHIKV cases in MHS beneficiaries via multiple data streams from 2005 through 2018, including: (i) clinical microbiology lab (serology and PCR) results from Disease Reporting System internet (DRSi)/EpiData Center, (ii) International Classification of Diseases, 10th Revision (ICD-10) code A92.0 CHIKV disease entries from TRICARE Encounter Data Non-Institutional (TEDNI), and (iii) ICD-10 code A92.0 CHIKV disease from Comprehensive Ambulatory/Professional Encounter Record (CAPER). The treatment locations of cases were inferred by clinical provider ZIP code. To estimate the risk of post-CHIKV rheumatological sequelae, CHIKV negative MHS beneficiary controls were matched (1:4) with cases by age group, gender, date of healthcare encounter (+/- 1 month), and beneficiary status at the time of matching healthcare encounter. Controls were randomly selected within these matching strata.

## **Demographic, post-CHIKV diagnosis and comorbidity data abstraction from the electronic medical record**

Demographic ICD-9 and ICD-10 code data abstracted from cases and controls (using Armed Forces Health Longitudinal Technology Application (AHLTA) and the Composite Health Care System (CHCS). The sequelae of interest were any rheumatologic disorders (See S1 Table for ICD-9 and ICD-10 codes). Comorbidity was defined as a condition/disorder (including rheumatological) which pre-existed before the time of the first CHIKV infection diagnosis (or first matched healthcare encounter of the time-matched

control. We defined post-CHIKV rheumatological complications as new post-CHIKV rheumatological diagnoses with a first onset at or after the first CHIKV diagnosis (or the healthcare encounter used for matching for controls without CHIKV). When a pre-CHIKV rheumatological and post-CHIKV rheumatological diagnosis mapped to the same ICD code, we further adjudicated a pre-existing rheumatological diagnoses from a new post-CHIKV complication using DX\_DESC-level diagnosis coding (Agency for Healthcare Research and Quality Clinical Classifications Software system code). A similar approach was taken for controls without CHIKV.

## Statistical analysis

Demographic, clinical, and occupational characteristics of cases and controls were summarized. The frequency of rheumatological sequelae were compared in cases and controls. Conditional logistic regression (on age and sex matched cases and controls) were used to estimate the independent association between CHIKV infection and short-term (<3 months) versus long-term (≥3 months) complications, adjusting for prior comorbidities (including pre-existing rheumatological comorbidities). Unadjusted and adjusted odds ratios were presented. Finally, among those with CHIKV infections, we performed multinomial regression for any to determine risk factors for any rheumatologic related sequelae. For each multinomial regression analysis, there were 3 comparisons: participants with short-term (<3 months), long-term (≥3 months) and no sequelae.

All p values were two-sided, with an alpha significance threshold of 0.05. Analyses were conducted using SAS software (version 9.4; SAS).

## Ethical considerations

This protocol was reviewed and approved for execution by the IRB of the Uniformed Services University of the Health Sciences, Bethesda, Maryland, United States of America.

## Results

We identified 195 unique CHIKV cases diagnosed in the MHS between July 2014 and December 2018 (S1 Fig). The most frequent locations of clinical encounters were in Puerto Rico, Texas, and California, but these reflect provider ZIP codes of diagnoses (including potential diagnoses made after deployments or other beneficiary travel) and do not necessarily reflect location of where cases acquired CHIKV infections (Fig 1). Our finding of the majority of cases being diagnosed in Puerto Rico agreed with prior, smaller studies in MHS beneficiaries [29, 30]. Time series of all MHS CHIKV cases (by month) indicated the peak of MHS CHIKV cases occurring in late 2014 during the peak year of the Americas CHIKV epidemic.

### Fig 1. Location of CHIKV cases by U.S. state or territory.

The median age of CHIKV cases was 42 years (IQR 31–54 years), and 43.6% were active duty servicemembers (Table 1). Compared to age, gender, beneficiary status, and healthcare encounter-matched controls, cases differed from controls with respect to race ( $p < 0.001$ ). Among active duty CHIKV cases, we noted that Army service and enlisted rank were most frequent; the frequency of these categories were more common than matched controls ( $p < 0.001$ ; Table 1). CHIKV cases had a higher frequency of all measured comorbidities compared to age, sex, and beneficiary-matched controls ( $p < 0.001$ ; Table 2).

**Table 1. Demographic and professional characteristics in CHIKV cases and controls.**

| CHIKV negative controls <sup>a</sup> | CHIKV cases | Total | p value <sup>b</sup> |
|--------------------------------------|-------------|-------|----------------------|
|--------------------------------------|-------------|-------|----------------------|



| No. of subjects (N)               | 780         | 195         | 975         |        |
|-----------------------------------|-------------|-------------|-------------|--------|
| Characteristic                    | n (n/N %)   | n (n/N %)   | n (n/N %)   |        |
| <b>Gender</b>                     |             |             |             | >.9999 |
| Male                              | 412 (52.82) | 103 (52.82) | 515 (52.82) |        |
| Female                            | 368 (47.18) | 92 (47.18)  | 460 (47.18) |        |
| <b>Age, median, [Q1–Q3]</b>       | 41 [29–56]  | 42 [31–54]  | 41 [30–55]  | 0.6026 |
| <b>Age</b>                        |             |             |             | >.9999 |
| ≤25                               | 84 (10.77)  | 21 (10.77)  | 105 (10.77) |        |
| 26–35                             | 204 (26.15) | 51 (26.15)  | 255 (26.15) |        |
| 36–45                             | 190 (24.36) | 48 (24.62)  | 238 (24.41) |        |
| 46–64                             | 204 (26.15) | 51 (26.15)  | 255 (26.15) |        |
| 65+                               | 98 (12.56)  | 24 (12.31)  | 122 (12.51) |        |
| <b>Race</b>                       |             |             |             | <.0001 |
| White                             | 321 (41.15) | 113 (57.95) | 434 (44.51) |        |
| Black                             | 55 (7.05)   | 12 (6.15)   | 67 (6.87)   |        |
| Asian or Pacific Islander         | 23 (2.95)   | 12 (6.15)   | 35 (3.59)   |        |
| Other                             | 21 (2.69)   | 30 (15.38)  | 51 (5.23)   |        |
| Unknown                           | 360 (46.15) | 28 (14.36)  | 388 (39.79) |        |
| <b>Beneficiary</b>                |             |             |             | >.9999 |
| Active duty                       | 340 (43.59) | 85 (43.59)  | 425 (43.59) |        |
| Dependent                         | 108 (13.85) | 27 (13.85)  | 135 (13.85) |        |
| Retiree                           | 80 (10.26)  | 20 (10.26)  | 100 (10.26) |        |
| Others                            | 252 (32.31) | 63 (32.31)  | 315 (32.31) |        |
| <b>Service branch<sup>c</sup></b> |             |             |             | <.0001 |
| Air Force                         | 189 (24.23) | 8 (4.10)    | 197 (20.21) |        |
| Army                              | 76 (9.74)   | 51 (26.15)  | 127 (13.03) |        |
| Coast Guard                       | 8 (1.03)    | 23 (11.79)  | 31 (3.18)   |        |
| Other                             | 67 (8.59)   | 3 (1.54)    | 70 (7.18)   |        |
| Not applicable                    | 440 (56.41) | 110 (56.41) | 550 (56.41) |        |

| Rank           | <.0001      |             |             |
|----------------|-------------|-------------|-------------|
| Enlisted       | 233 (29.87) | 69 (35.38)  | 302 (30.97) |
| Officer        | 107 (13.72) | 16 (8.21)   | 123 (12.62) |
| Not applicable | 440 (56.41) | 110 (56.41) | 550 (56.41) |

<sup>a</sup>Controls were matched with cases by age group, gender, beneficiary and date of encounter (+/- 1 month).

<sup>b</sup>p-values are calculated from a Chi-squared/Fisher's exact test or Kruskal-Wallis test, as appropriate.

<sup>c</sup>Service branch and rank are only available for active duty. Other non-active duty subjects are grouped under "Not applicable" category.

**Table 2. Comorbidities in CHIKV cases and controls.**

|                                                              | CHIK-       | CHIK+      | Total       | p value <sup>a</sup> |
|--------------------------------------------------------------|-------------|------------|-------------|----------------------|
| <b>Total # of subjects</b>                                   | 780         | 195        | 975         |                      |
| <b>Comorbidities (ICD diagnoses before time of matching)</b> |             |            |             |                      |
| None                                                         | 461 (59.10) | 34 (17.44) | 495 (50.77) | <.0001               |
| Cancer                                                       | 30 (3.85)   | 22 (11.28) | 52 (5.33)   | <.0001               |
| Cardiovascular disease                                       | 196 (25.13) | 95 (48.72) | 291 (29.85) | <.0001               |
| Chronic respiratory disease                                  | 91 (11.67)  | 58 (29.74) | 149 (15.28) | <.0001               |
| Mental health condition                                      | 117 (15.00) | 72 (36.92) | 189 (19.38) | <.0001               |
| Osteoporosis                                                 | 26 (3.33)   | 19 (9.74)  | 45 (4.62)   | 0.0001               |
| Upper gastrointestinal disease                               | 103 (13.21) | 75 (38.46) | 178 (18.26) | <.0001               |
| Neurologic disease                                           | 122 (15.64) | 80 (41.03) | 202 (20.72) | <.0001               |
| Rheumatologic disease                                        | 117 (15.00) | 84 (43.08) | 201 (20.62) | <.0001               |
| Osteoarthritis                                               | 92 (11.79)  | 55 (28.21) | 147 (15.08) | <.0001               |
| Other non-traumatic joint disorders                          | 29 (3.72)   | 32 (16.41) | 61 (6.26)   | <.0001               |
| Rheumatoid arthritis and related disease                     | 12 (1.54)   | 17 (8.72)  | 29 (2.97)   | <.0001               |
| Spondylosis; disc disorders; other back problems             | 51 (6.54)   | 37 (18.97) | 88 (9.03)   | <.0001               |

<sup>a</sup>p values were calculated from a Chi-squared/Fisher's exact test.

We noted 63/195 (32.3%) of CHIKV cases had an incident post-CHIKV rheumatological diagnosis, compared to 156/780 (20.0%) of controls ( $p = 0.0002$ ) (Table 3). Osteoarthritis, rheumatoid arthritis and related diagnoses (including inflammatory polyarthropathy), and non-traumatic joint disorder associated categories (including unspecified arthropathy, polyarthralgia and polyarthritides) were noted with statistically significant higher frequency in post-CHIKV cases versus controls (Table 3, S2 Table).

**Table 3. Rheumatological sequelae in CHIKV cases and controls.**

|                                                   | CHIK-       | CHIK+      | Total       | p value <sup>a</sup> |
|---------------------------------------------------|-------------|------------|-------------|----------------------|
| <b>No. of subjects</b>                            | 780         | 195        | 975         |                      |
| <b>Any rheumatic sequelae<sup>b</sup></b>         | 156 (20.00) | 63 (32.31) | 219 (22.46) | 0.0002               |
| <b>Rheumatic sequelae by category<sup>c</sup></b> |             |            |             |                      |
| Infective arthritis and osteomyelitis             | 0 (0.00)    | 1 (0.51)   | 1 (0.10)    | 0.2000               |
| Malaise and fatigue                               | 59 (7.56)   | 18 (9.23)  | 77 (7.90)   | 0.4402               |
| Osteoarthritis                                    | 2 (0.26)    | 4 (2.05)   | 6 (0.62)    | 0.0166               |
| Other connective tissue disease                   | 12 (1.54)   | 4 (2.05)   | 16 (1.64)   | 0.5404               |
| Other non-traumatic joint disorders               | 17 (2.18)   | 21 (10.77) | 38 (3.90)   | <.0001               |
| Other screening for suspected conditions          | 81 (10.38)  | 24 (12.31) | 105 (10.77) | 0.4384               |
| Rheumatoid arthritis and related disease          | 2 (0.26)    | 7 (3.59)   | 9 (0.92)    | 0.0003               |

<sup>a</sup>p values were calculated from a Chi-squared/Fisher's exact test.

<sup>b</sup>Subject with more than one diagnosis code were only counted once.

<sup>c</sup>CCS\_DX\_DESC category, subject may have multiple diagnosis with different categories.

Compared to controls, CHIKV infection was associated with post-infection rheumatological diagnoses (aOR = 1.91, 95% CI 1.272–2.870,  $p = 0.0018$ ) after adjusting for prior the presence of any prior pre-CHIKV rheumatological diagnoses, beneficiary status, age, sex, and race (Table 4). The magnitude of this

effect size was larger when the outcome was stratified into short-term ( $\leq 3$  month) post-CHIKV rheumatological diagnoses versus long-term (diagnosis recurred beyond 3 months post-CHIKV infection) rheumatic sequelae (aOR = 6.41,  $p < 0.001$  short-term sequelae; aOR = 1.43,  $p = 0.09$  long-term sequelae, respectively) (Table 5). Those with post-CHIKV rheumatological sequelae had a median 7 healthcare encounters for rheumatological diagnoses (IQR 3–15, range 1–33) through the period of observation.

**Table 4. Unadjusted and adjusted odds ratio of CHIKV infection on rheumatic-related sequelae (n = 975).**

|                                        | Unadjusted |         |         |        | Adjusted <sup>a</sup> |        |         |        |
|----------------------------------------|------------|---------|---------|--------|-----------------------|--------|---------|--------|
|                                        | OR         | 95 % CI | p value |        | OR                    | 95% CI | p value |        |
| <b>CHIK positive</b>                   | 1.909      | 1.348   | 2.703   | 0.0003 | 1.911                 | 1.272  | 2.870   | 0.0018 |
| <b>Rheumatic related comorbidity</b>   | 1.609      | 1.134   | 2.283   | 0.0078 | 1.137                 | 0.763  | 1.695   | 0.5283 |
| <b>Age</b>                             | 1.011      | 1.002   | 1.019   | 0.0107 | 1.012                 | 1.002  | 1.022   | 0.0181 |
| <b>Male</b>                            | 0.984      | 0.728   | 1.330   | 0.9171 | 0.918                 | 0.620  | 1.358   | 0.6669 |
| <b>Race (ref: White)</b>               |            |         |         |        |                       |        |         |        |
| Black                                  | 1.062      | 0.580   | 1.944   | 0.8464 | 1.178                 | 0.633  | 2.192   | 0.6055 |
| Asian or Pacific Islander              | 0.846      | 0.359   | 1.995   | 0.7024 | 0.758                 | 0.314  | 1.830   | 0.3551 |
| Other                                  | 0.960      | 0.698   | 1.319   | 0.8001 | 1.294                 | 0.846  | 1.977   | 0.2307 |
| <b>Beneficiary (ref: active duty)</b>  |            |         |         |        |                       |        |         |        |
| Dependents of active duty              | 0.591      | 0.353   | 0.990   | 0.0458 | — <sup>a</sup>        |        |         |        |
| Retirees                               | 0.752      | 0.435   | 1.301   | 0.3084 | — <sup>a</sup>        |        |         |        |
| Others                                 | 1.056      | 0.752   | 1.483   | 0.7541 | — <sup>a</sup>        |        |         |        |
| <b>Service branch (ref: Air Force)</b> |            |         |         |        |                       |        |         |        |
| Army                                   | 2.088      | 1.266   | 3.444   | 0.0039 | 1.582                 | 0.930  | 2.691   | 0.0004 |
| Coast Guard                            | 0.564      | 0.187   | 1.702   | 0.3092 | 0.360                 | 0.113  | 1.143   | 0.1017 |
| Other                                  | 0.709      | 0.342   | 1.472   | 0.3565 | 0.686                 | 0.328  | 1.437   | 0.7368 |

|                                  |       |       |       |        |                   |       |       |        |
|----------------------------------|-------|-------|-------|--------|-------------------|-------|-------|--------|
| Not applicable (non-active duty) | 1.039 | 0.697 | 1.550 | 0.8501 | 0.640             | 0.379 | 1.080 | 0.4056 |
| <b>Rank (ref: enlisted)</b>      |       |       |       |        |                   |       |       |        |
| Officer                          | 1.600 | 0.996 | 2.571 | 0.0518 | <sup>a</sup><br>— |       |       |        |
| Not applicable (non-active duty) | 1.016 | 0.721 | 1.431 | 0.9287 | <sup>a</sup><br>— |       |       |        |

<sup>a</sup>Beneficiary and rank are not included in the adjusted model due to collinearity with service branch.

**Table 5. Adjusted odds ratio on rheumatic-related short-term and long-term sequelae (n = 975).**

|                                      | Short-term (<3 month) |        |         |        | Long-term (≥3 month) |        |         |        |
|--------------------------------------|-----------------------|--------|---------|--------|----------------------|--------|---------|--------|
|                                      | OR                    | 95% CI | p value |        | OR                   | 95% CI | p value |        |
| <b>CHIK positive</b>                 | 6.410                 | 2.904  | 14.152  | <.0001 | 1.428                | 0.947  | 2.153   | 0.0894 |
| <b>Rheumatic-related comorbidity</b> | 0.616                 | 0.242  | 1.567   | 0.3087 | 1.329                | 0.878  | 2.012   | 0.1789 |
| <b>Age</b>                           | 1.018                 | 0.997  | 1.040   | 0.0991 | 1.008                | 0.998  | 1.018   | 0.0989 |
| <b>Male</b>                          | 1.053                 | 0.469  | 2.365   | 0.9011 | 1.071                | 0.731  | 1.569   | 0.7247 |
| <b>Race (ref: white)</b>             |                       |        |         |        |                      |        |         |        |
| Black                                | 1.118                 | 0.238  | 5.243   | 0.8593 | 1.093                | 0.573  | 2.085   | 0.5557 |
| Asian or Pacific Islander            | 1.614                 | 0.336  | 7.748   | 0.6634 | 0.702                | 0.261  | 1.882   | 0.4449 |
| Other                                | 1.314                 | 0.542  | 3.186   | 0.8761 | 1.002                | 0.668  | 1.501   | 0.7193 |

*Note:* 1) “No Rheumatic related sequelae” is consider as reference group for the outcome variable. 2) “Service” is excluded from the adjusted model due to quasi-complete separation of data points.

Among those with CHIKV infections, we found no association between post-CHIKV rheumatic sequelae and age, sex, race, active-duty status, or pre-existing comorbidities. Non-Army service branch and female sex was associated with a reduced odds of post-CHIKV rheumatological sequelae, but this was not statistically significant (Table 6).

**Table 6. Unadjusted and adjusted odds ratio on rheumatic-related sequelae among people with CHIK infection (n = 195).**

|                                   | Unadjusted |        |         |        | Adjusted |        |         |        |
|-----------------------------------|------------|--------|---------|--------|----------|--------|---------|--------|
|                                   | OR         | 95% CI | p value |        | OR       | 95% CI | p value |        |
| <b>Age</b>                        | 1.002      | 0.985  | 1.020   | 0.8156 | 1.006    | 0.978  | 1.034   | 0.6969 |
| <b>Male (ref: female)</b>         | 0.974      | 0.534  | 1.777   | 0.9323 | 0.679    | 0.288  | 1.599   | 0.3751 |
| <b>Race (ref: white)</b>          |            |        |         |        |          |        |         |        |
| Black                             | 0.685      | 0.175  | 2.680   | 0.5865 | 0.624    | 0.138  | 2.816   | 0.4970 |
| Asian or Pacific Islander         | 1.467      | 0.436  | 4.935   | 0.5356 | 1.350    | 0.376  | 4.853   | 0.4577 |
| Other                             | 0.924      | 0.468  | 1.826   | 0.8208 | 0.866    | 0.397  | 1.888   | 0.8440 |
| <b>Service branch (ref: Army)</b> |            |        |         |        |          |        |         |        |
| Coast Guard                       | 0.256      | 0.076  | 0.860   | 0.0276 | 0.275    | 0.077  | 0.979   | 0.0917 |
| Other                             | 1.461      | 0.395  | 5.407   | 0.5703 | 1.566    | 0.406  | 6.042   | 0.0634 |
| Not applicable (non-active duty)  | 0.457      | 0.228  | 0.913   | 0.0266 | 0.341    | 0.141  | 0.828   | 0.0922 |
| <b>Comorbidities</b>              |            |        |         |        |          |        |         |        |
| Cancer                            | 0.975      | 0.376  | 2.526   | 0.9586 | 1.029    | 0.324  | 3.269   | 0.9618 |
| Cardiovascular disease            | 0.937      | 0.514  | 1.709   | 0.8320 | 0.799    | 0.371  | 1.720   | 0.5659 |
| Chronic respiratory disease       | 1.431      | 0.751  | 2.725   | 0.2757 | 1.902    | 0.841  | 4.300   | 0.1226 |
| Mental health condition           | 0.974      | 0.523  | 1.815   | 0.9339 | 0.889    | 0.420  | 1.881   | 0.7575 |
| Osteoporosis                      | 1.250      | 0.467  | 3.346   | 0.6569 | 1.488    | 0.390  | 5.680   | 0.5609 |
| Upper gastrointestinal disease    | 0.977      | 0.527  | 1.812   | 0.9422 | 0.988    | 0.482  | 2.024   | 0.9737 |
| Neurologic disease                | 0.757      | 0.408  | 1.403   | 0.3762 | 0.657    | 0.300  | 1.439   | 0.2941 |
| Rheumatologic                     | 1.086      | 0.593  | 1.988   | 0.7899 | 0.985    | 0.472  | 2.059   | 0.9688 |

Note: Service branch was regrouped to avoid quasi-complete separation. Other includes: Air Force and others.

## Conclusion

Understanding the risk of CHIKV infection and complications in deploying U.S. military servicemembers and other MHS beneficiaries is important, particularly with upcoming possible CHIKV vaccine licensure.

We found a very low number of CHIKV cases identified in the MHS, despite this study period covering the peak CHIKV epidemic in the Americas and leveraging data from about 9.5 million beneficiaries. Our findings correlate with low number of CHIKV infections in other U.S. MHS studies, although such studies were either smaller, earlier in the CHIKV epidemic and/or less comprehensive in their use of electronic medical record (eMR) data sources [28, 31]. Additionally, our findings correlate with a recent post-deployment serology study of 1500 deployments to South America and Puerto Rico with a low post-deployment seropositivity rate of 1.7% (highest in those serving in Puerto Rico) [32]. Our findings further agree with studies in other armed forces which also note a low frequency of CHIKV infections [28].

These low frequencies of infection may be attributed to effective personal mosquito avoidance or heterogeneity in risk exposure (for example, based on deployment role) when deployed or activated in CHIKV endemic countries or territories. Among CHIKV infections in servicemembers, we noted higher frequency Army service and enlisted ranks compared to matched servicemember controls without CHIKV; these groups have previously been noted at higher risk for other arboviruses [33, 34]. While the location of diagnosis may not reflect where the infection was acquired, the highest number of cases were diagnosed in Puerto Rico is consistent with the known high transmission of CHIKV during the neotropical epidemic [35].

While the overall number of infections was very low, we found a substantive risk of post-CHIKV rheumatological complications. We noted a considerable burden of disease with a median 7 healthcare encounters for this complication, and 25% of these complicated CHIKV cases required between 15 and 33 further encounters through the period of observation. These findings highlight that, while CHIKV infections are overall rare in MHS beneficiaries, patient morbidity in complicated CHIKV cases can be substantial, as noted in non-MHS studies [22].

255  
 256 The overall low number of CHIKV infections limited statistical power for examining risk factors for post-  
 257 CHIKV sequelae. We found a non-statistically significant trend toward Army and male sex having a  
 258 higher risk of rheumatic complications, but no other predictors were noted, including pre-existing  
 259 comorbidities. Further study of cumulative CHIKV infections in MHS-based virtual cohorts over time may  
 260 identify clearer risk factors for this complication, and this may assist in more precise prognostication of  
 261 CHIKV cases in the MHS. As this study comprises the largest number of CHIKV infections in any military  
 262 study, we would conclude that prediction of MHS CHIKV cases may progress to complicated  
 263 rheumatological sequelae remains challenging, underscoring the need for optimal prevention of CHIKV  
 264 infection.

265  
 266 There were several strengths to this study. The use of the MHS includes a substantive number of  
 267 beneficiaries who deploy or are stationed in CHIKV endemic regions and allowed for long term follow-up  
 268 of cases to determine longer term complications. We derived CHIKV cases from a range of eMR data  
 269 sources, including clinical microbiology laboratory results, to identify more infections than prior MHS-  
 270 based studies [28-31]. Our study limitations included the use of ICD codes to diagnose CHIKV and post-  
 271 CHIKV complications; prior evaluations of CHIKV ICD diagnosis coding have noted imperfect specificity  
 272 [31] and this study was unable to perform chart adjudications. Conversely, CHIKV diagnoses may have  
 273 been missed in some clinical presentations, and not all cases may have presented to care (including  
 274 during deployments).

275  
 276 Future directions include further studies which could also examine for non-rheumatological CHIKV  
 277 sequelae such as neurocognitive complications, mood, and long-term functional impact (for example,  
 278 [36, 37]). Finally, studies could leverage sera routinely collected from the U.S. military servicemembers



and used for arboviral research (i.e., the Department of Defense Sera Repository [32-34]) to identify prognostic and treatment related biomarkers for those beneficiaries with persistent post-CHIKV sequelae, as well as enabling ongoing serosurveillance of the risk and risk factors of CHIKV in deployed military, particularly during an era of increasing CHIKV risk in the Americas [9].

## Disclaimer

The contents of this publication are the sole responsibility of the author(s) and do not necessarily reflect the views, opinions, or policies of Uniformed Services University of the Health Sciences; the Department of Defense; the Departments of the Army, Navy, or Air Force; the Defense Health Agency; the National Institutes of Health, the Department of Health and Human Services or the Henry M. Jackson Foundation for the Advancement of Military Medicine, Inc. Mention of trade names, commercial products, or organizations does not imply endorsement by the U.S. government. The investigators have adhered to the policies for protection of human subjects as prescribed in 45 CFR 46.

## Funding statement

The protocol was executed by the Infectious Disease Clinical Research Program (IDCRP), a Department of Defense program executed by the Uniformed Services University of the Health Sciences through a cooperative agreement by the Henry M. Jackson Foundation for the Advancement of Military Medicine, Inc.. This project has been funded in part by the National Institute of Allergy and Infectious Diseases at the National Institutes of Health, under an interagency agreement (Y1-AI-5072); and the Military Infectious Diseases Research Program. The authors declare no conflicts of interest.

## References

1. Weaver SC, Osorio JE, Livengood JA, Chen R, Stinchcomb DT. Chikungunya virus and prospects for a vaccine. *Expert Rev Vaccines*. 2012;11(9): 1087-1101. pmid:23151166
2. Weaver SC, Forrester NL. Chikungunya: Evolutionary history and recent epidemic spread. *Antiviral Res*. 2015;120: 32-39. pmid:25979669
3. Rezza G, Weaver SC. Chikungunya as a paradigm for emerging viral diseases: Evaluating disease impact and hurdles to vaccine development. *PLoS Negl Trop Dis*. 2019;13(1): e0006919. pmid:30653504
4. 54th Directing Council. Report on chikungunya virus transmission and its impact in the region of the Americas. 67th Session of the Regional Committee of WHO for the Americas; September 28 to October 2, 2015; Washington, DC: Pan American Health Organization and World Health Organization Regional Office for the Americas. Available from: <https://www3.paho.org/hq/dmdocuments/2015/CD54-INF-3-e.pdf>
5. Ushijima Y, Abe H, Mbadinga MJVM, Ondo GN, Bikangui R, Agnandji ST, et al. Re-emergence of dengue, chikungunya, and Zika viruses in 2021 after a 10-year gap in Gabon. *IJID Reg*. 2022;5: 68-71. pmid:36200059
6. Asaga Mac P, Airiohuodion PE, Yako AB, Makpo JK, Kroeger A. The seroprevalence and hidden burden of chikungunya endemicity and malaria mono- and coinfection in Nigeria. *Int J Environ Res Public Health*. 2022;19(15): 8896. pmid:35897268
7. Bettis AA, L'Azou Jackson M, Yoon IK, Breugelmans JG, Goios A, Gubler DJ, et al. The global epidemiology of chikungunya from 1999 to 2020: A systematic literature review to inform the development and introduction of vaccines. *PLoS Negl Trop Dis*. 2022;16(1): e0010069. pmid:35020717

8. Pan American Health Organization, World Health Organization. Cases of chikungunya virus disease. 2023. Available from: <https://www3.paho.org/data/index.php/en/mnu-topics/chikv-en/550-chikv-weekly-en.html>
9. Centers for Disease Control and Prevention. Increased chikungunya virus activity in Paraguay and associated risk to travelers. 2023. Available from: <https://emergency.cdc.gov/han/2023/han00487.asp>
10. Pan American Health Organization, World Health Organization. Epidemiological alert: Chikungunya increase in the region of the Americas. 2023. Available from: <https://www.paho.org/en/documents/epidemiological-alert-chikungunya-increase-region-americas>
11. Pan American Health Organization, World Health Organization. Epidemiological alert: Increase in cases and deaths from chikungunya in the region of the Americas. 2023. Available from: <https://www.paho.org/en/documents/epidemiological-alert-increase-cases-and-deaths-chikungunya-region-americas>
12. Centers for Disease Control and Prevention. Clinical evaluation and disease. 2023. Available from: <https://www.cdc.gov/chikungunya/hc/clinicalevaluation.html>
13. de Moraes Alves Barbosa Oliveira R, Kalline de Almeida Barreto F, Praça Pinto G, Timbó Queiroz I, Montenegro de Carvalho Araújo F, Wanderley Lopes K, et al. Chikungunya death risk factors in Brazil, in 2017: A case-control study. PLoS One. 2022;17(4): e0260939. pmid:35389992
14. Sharp TM, Keating MK, Shieh WJ, Bhatnagar J, Bollweg BC, Levine R, et al. Clinical characteristics, histopathology, and tissue immunolocalization of chikungunya virus antigen in fatal cases. Clin Infect Dis. 2021;73(2): e345-e354. pmid:32615591
15. Webb E, Michelen M, Rigby I, Dagens A, Dahmash D, Cheng V, et al. An evaluation of global Chikungunya clinical management guidelines: A systematic review. EClinicalMedicine. 2022;54: 101672. pmid:36193172

16. Pescarini JM, Rodrigues M, Paixão ES, Cardim L, Brito CAA, Costa MDCN, et al. Dengue, Zika, and chikungunya viral circulation and hospitalization rates in Brazil from 2014 to 2019: An ecological study. *PLoS Negl Trop Dis*. 2022;16(7): e0010602. pmid:35895718
17. Chee YS, Ahamad Fouzi N, Chong YM, Sam IC, Chan YF, Chua CL, et al. Chikungunya encephalopathy and pneumonia in a young infant presenting with septic shock. *J Paediatr Child Health*. 2022;58(8): 1468-1471. pmid:35175651
18. Centers for Disease Control and Prevention. Diagnostic testing. 2023. Available from: <https://www.cdc.gov/chikungunya/hc/diagnostic.html>
19. Centers for Disease Control and Prevention. Treatment and Prevention. 2023. Available from: <https://www.cdc.gov/chikungunya/hc/treatment-prevention.html>
20. Tran QM, Soda J, Siraj A, Moore S, Clapham H, Perkins TA. Expected endpoints from future chikungunya vaccine trial sites informed by serological data and modeling. *Vaccine*. 2023;41(1): 182-192. pmid:36424258
21. Hills S. Overview of chikungunya and chikungunya vaccines. Meeting of the Advisory Committee on Immunization Practices (ACIP); October 19-20, 2022; Atlanta, Georgia: Centers for Disease Control and Prevention.
22. Suhrbier A. Rheumatic manifestations of chikungunya: Emerging concepts and interventions. *Nat Rev Rheumatol*. 2019;15(10): 597-611. pmid:31481759
23. Rodríguez-Morales AJ, Cardona-Ospina JA, Urbano-Garzón SF, Hurtado-Zapata JS. Prevalence of post-chikungunya infection chronic inflammatory arthritis: A systematic review and meta-analysis. *Arthritis Care Res (Hoboken)*. 2016;68(12): 1849-1858. pmid:27015439
24. Paixão ES, Rodrigues LC, Costa MDCN, Itaparica M, Barreto F, Gerardin P, et al. Chikungunya chronic disease: a systematic review and meta-analysis. *Trans R Soc Trop Med Hyg*. 2018;112(7): 301-316. pmid:30007303

25. Sengupta S, Bhattacharya N, Tripathi A. Increased CRP, anti-CCP antibody, IL-2R, COMP levels in prognosis of post-chikungunya chronic arthritis and protective role of their specific genotypes against arthritic manifestation. *Virus Res.* 2022;323: 198998. pmid:36356677
26. Dobbs JE, Tritsch SR, Encinales L, Cadena A, Suchowiecki K, Simon G, et al. Regulatory T-cells and GARP expression are decreased in exercise-associated chikungunya viral arthritis flares. *Front Immunol.* 2022;13: 1007106. pmid:36275717
27. Ranzolin A, Marques CDL, da Rocha Junior LF, Duarte ALBP, de Lima HD, de Almeida Martins LM, et al. Treatment with biological therapy is associated with faster recovery and lower frequency of treatment switch among rheumatic patients with chikungunya fever. *Adv Rheumatol.* 2022;62(1): 44. pmid:36376923
28. Frickmann H, Herchenröder O. Chikungunya virus infections in military deployments in tropical settings—a narrative minireview. *Viruses.* 2019;11(6): 550. pmid:31197085
29. Writer JV, Hurt L. Chikungunya infection in DoD healthcare beneficiaries following the 2013 introduction of the virus into the Western Hemisphere, 1 January 2014 to 28 February 2015. *MSMR.* 2015;22(10): 2-6. pmid:26505074
30. O'Donnell FL, Stahlman S, Fan M. Surveillance for vector-borne diseases among active and reserve component service members, U.S. Armed Forces, 2010-2016. *MSMR.* 2018;25(2): 8-15. pmid:29485891
31. Wellington T, Fraser JA, Kuo HC, Hickey PW, Lindholm DA. The burden of arboviral infections in the Military Health System 2012-2019. *Am J Trop Med Hyg.* 2023;108(5): 1007-1013. pmid:37037439
32. Pollett S, Lanteri C, Forshey B, Trefry S, Winkelmann E, Nasar F, et al. Serosurveillance of chikungunya infections among U.S. military personnel deploying in the Americas, 2013-2020. *ASTMH 71st Annual Meeting; October 30 to November 3, 2022; Seattle, Washington: American Society of Tropical Medicine and Hygiene.* Available from:

<https://www.astmh.org/getmedia/65cc0d8d-1208-4d9a-9f77-734d40de4c02/ASTMH-2022-Annual-Meeting-Abstract-Book.pdf>

33. Pollett S, Kuklis CH, Barvir DA, Jarman RG, Romaine RM, Forshey BM, et al. The seroepidemiology of dengue in a US military population based in Puerto Rico during the early phase of the Zika pandemic. *PLoS Negl Trop Dis.* 2022;16(1): e0009986. pmid:35061659
34. Hesse EM, Martinez LJ, Jarman RG, Lyons AG, Eckels KH, De La Barrera RA, et al. Dengue virus exposures among deployed U.S. military personnel. *Am J Trop Med Hyg.* 2017;96(5): 1222-1226. pmid:28193746
35. Sharp TM, Roth NM, Torres J, Ryff KR, Pérez Rodríguez NM, Mercado C, et al. Chikungunya cases identified through passive surveillance and household investigations—Puerto Rico, May 5–August 12, 2014. *MMWR Morb Mortal Wkly Rep.* 2014;63(48): 1121-1128. pmid:25474032
36. Peixoto VGMNP, Azevedo JP, Luz KG, Almondes KM. Cognitive dysfunction of chikungunya virus infection in older adults. *Front Psychiatry.* 2022;13: 823218. pmid:35449568
37. Doran C, Elsinga J, Fokkema A, Berenschot K, Gerstenbluth I, Duits A, et al. Long-term chikungunya sequelae and quality of life 2.5 years post-acute disease in a prospective cohort in Curacao. *PLoS Negl Trop Dis.* 2022;16(3): e0010142. pmid:35231033

## Supporting information

**S1 Fig. Chikungunya virus case identification from U.S. Military Health System electronic medical record systems.** TEDNI—TRICARE Encounter Data Non-Institutional; CAPER—Comprehensive Ambulatory/Professional Encounter Record.

**S1 Table. International Classification of Diseases, 9th Revision (ICD-9) and ICD-10 codes (including cross-walked ICD-9 codes) used to identify rheumatological healthcare encounters in cases and controls.**

421

422     **S2 Table. Long description of rheumatological healthcare encounters by chikungunya virus (CHIKV)**  
423     **infection status.**

Fig 1.

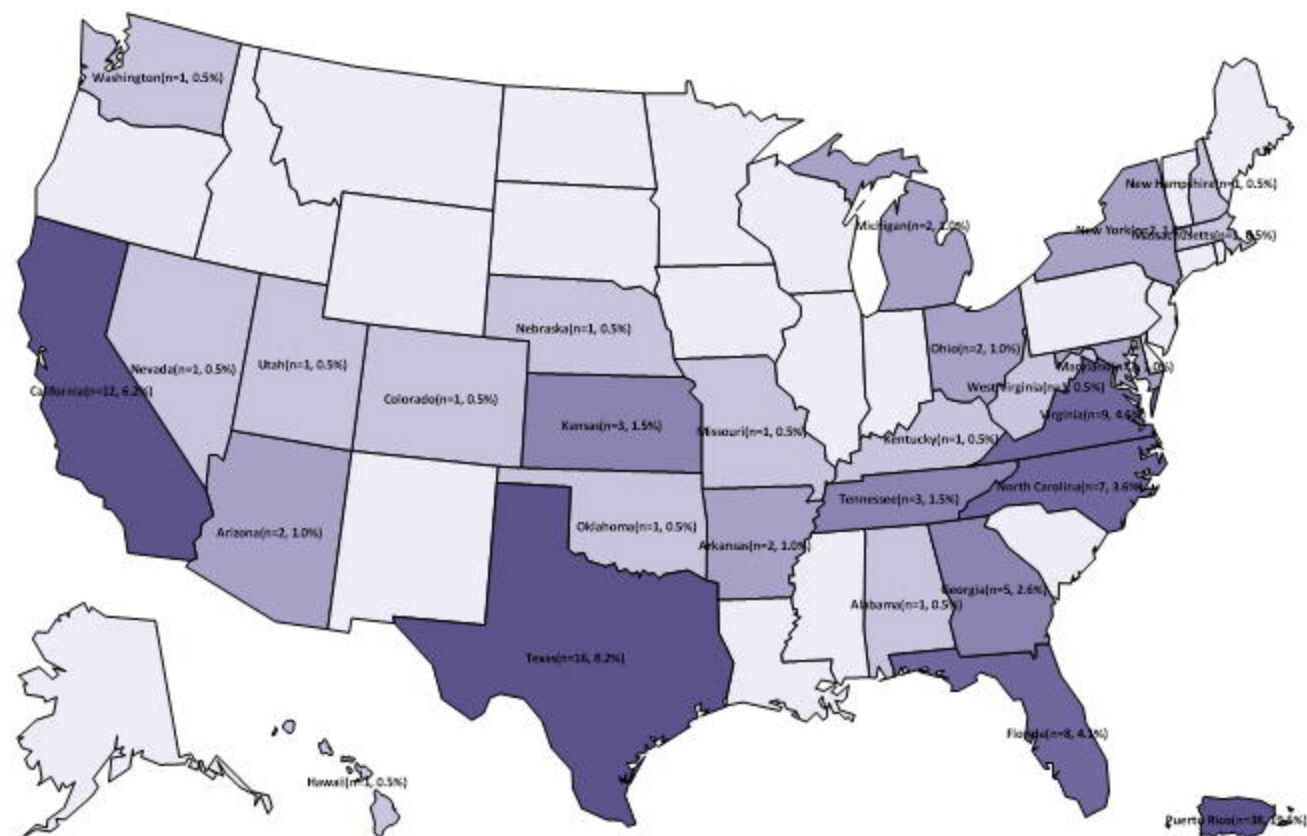

Source: https://medrxiv.org/content/10.1101/2023.11.22.23298875.full.pdf
